# Supplementary material for: Is an earlier onset of focal epilepsy associated with atypical language lateralization? A systematic review, meta-analysis and new data
Source: PubMed Central journal article supplement — medRxiv. 2024 Nov 13:2024.11.13.24315462. Preprint. [Version 1] doi: 10.1101/2024.11.13.24315462 (PMC11601735; doi:10.1101/2024.11.13.24315462), 2024-11-13

## Supplementary Materials

### 1.1 Exclusion of individual participants

*Supplementary Table 1. List of studies with individuals removed for the meta-analysis*

| <b>Study</b>                 | <b>Participants excluded, reason</b>                                                                                                              |
|------------------------------|---------------------------------------------------------------------------------------------------------------------------------------------------|
| Arora et al. (2009)          | Missing LI for relevant task (9), no specific age at seizure onset (3), bilateral epilepsy (1), epilepsy not lateralized (1), prior resection (1) |
| Banjac et al. (2022)         | Overlapping with Banjac et al. (2021) (12)                                                                                                        |
| Benjamin et al. (2017)       | Postoperative fMRI only (4), poor quality fMRI (3)                                                                                                |
| Hertz-Pannier et al. (1997)  | Epilepsy not lateralized (1)                                                                                                                      |
| Herfurth et al. (2022)       | Missing LI for relevant task (10)                                                                                                                 |
| Kokkinos & Seimenis (2024)   | Epilepsy not lateralized (2)                                                                                                                      |
| Norrelgen et al. (2015)      | Epilepsy not lateralized (4), insufficient activation for LI calculation (2)                                                                      |
| Okahara et al. (2024)        | Epilepsy not lateralized (2)                                                                                                                      |
| Szaflarski et al. (2008)     | Postoperative fMRI only (2)                                                                                                                       |
| Thivard et al. (2005)        | Insufficient activation for LI calculation (2)                                                                                                    |
| Trimmel et al. (2019)        | Missing LI for relevant task (1)                                                                                                                  |
| van der Kallen et al. (1998) | No specific age at seizure onset (3)                                                                                                              |
| Yuan et al. (2006)           | Epilepsy not lateralized (5)                                                                                                                      |
| Wilke et al. (2011)          | Missing LI for relevant task (4)                                                                                                                  |

### 1.2 Meta-analysis with onset < 18 years of age

There was no significant correlation between age at seizure onset and language lateralization in the sample with onset before 18 years of age ( $r=0.1$ ,  $p=.05$ ,  $k=51$ ,  $n=897$ ). Influence analysis indicated that effect size was substantially influenced by individual studies with pooled effect sizes ranging from 0.07 to 0.11. Egger's regression test for funnel plot asymmetry was significant ( $p=.049$ ). After applying the Duval and Tweedie trim-and-fill method to adjust for publication bias, the correlation became significant ( $r=0.14$ ,  $p=.005$ ). Four samples were identified as outliers due to the lack of overlap between the 95% confidence intervals of these studies and the pooled effect size (left samples: Hertz-Pannier et

al., 1997; Norrelgen et al., 2015; Szaflarski et al., 2008; right sample: Koc et al., 2020). After the removal of these outliers, the correlation became significant ( $r=0.1$ ,  $p=.009$ ,  $k=47$ ,  $n=869$ ).

There was no significant correlation between age at seizure onset and LI in the left ( $r=0.08$ ,  $p=.246$ ,  $k=33$ ,  $n=643$ ) or right hemisphere group separately ( $r=0.13$ ,  $p=.200$ ,  $k=18$ ,  $n=254$ ), and no difference in the correlation between groups ( $Q=0.30$ ,  $p=.585$ ). After the removal of the four previously identified outliers, the correlation became significant in the right ( $r=0.15$ ,  $p=.031$ ,  $k=17$ ,  $n=248$ ) but not the left hemisphere group ( $r=0.07$ ,  $p=.175$ ,  $k=30$ ,  $n=621$ ). There was still no difference in the correlation between groups ( $Q=1.12$ ,  $p=.290$ ).

### 1.3 Supplementary figures

*Supplementary Fig. 1. Contour-enhanced funnel plot for the total sample meta-analysis.*

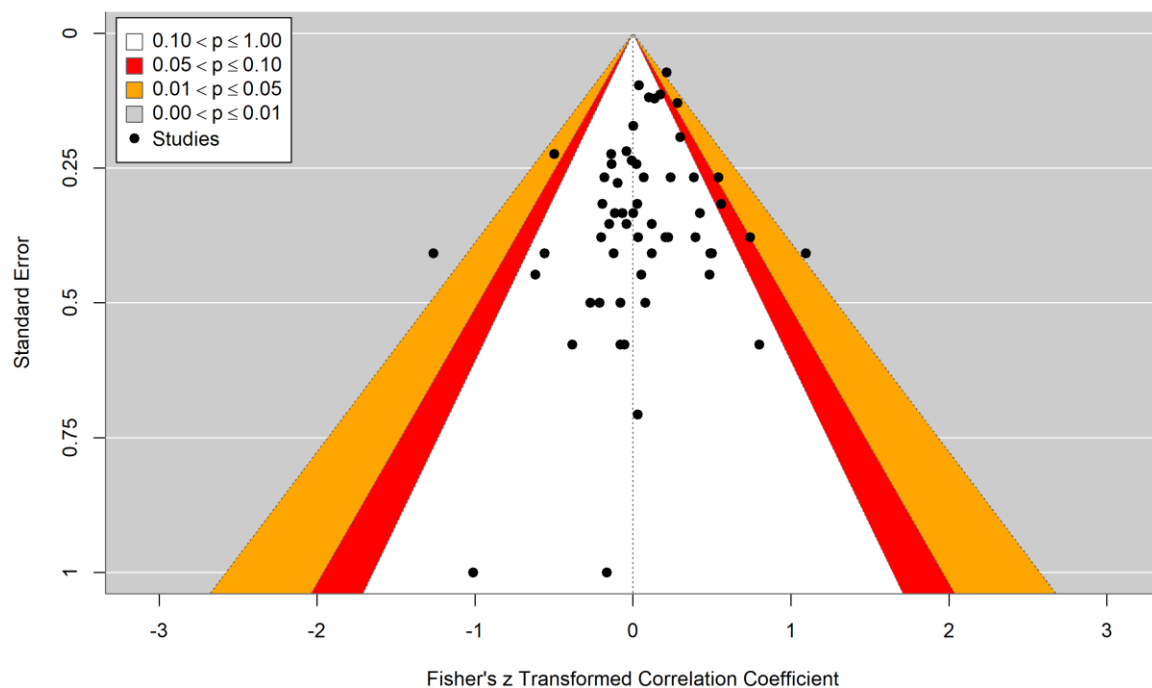

Supplement: media-1.pdf [file media-1.pdf]
